# Supplementary material for: Pleckstrin homology domain-containing protein PHLDB3 supports cancer growth via a negative feedback loop involving p53
Source: PubMed Central journal article supplement (PMC5196188; doi:10.1038/ncomms13755), 2016-12-23
Supplement: ncomms13755-s1.pdf [file ncomms13755-s1.pdf]

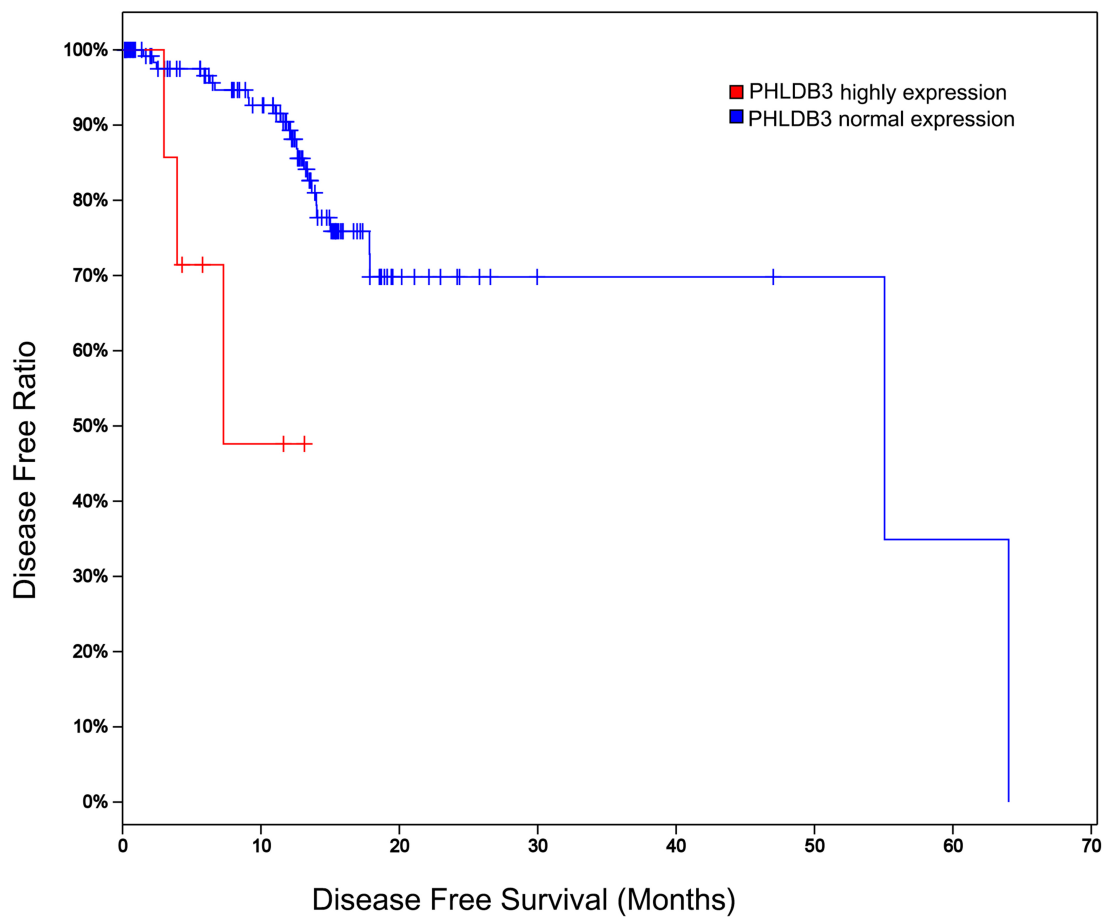

**Supplementary Figure 1. High expression of PHLDB3 is associated with PFS of Stomach Adenocarcinoma patients.** The PHLDB3 expression and DFS survival data of Stomach Adenocarcinoma study (TCGA, Nature 2014) were downloaded from the cBioPortal for Cancer Genomics (<http://www.cbioportal.org/>). Logrank Test, P-Value: 8.911e-4.

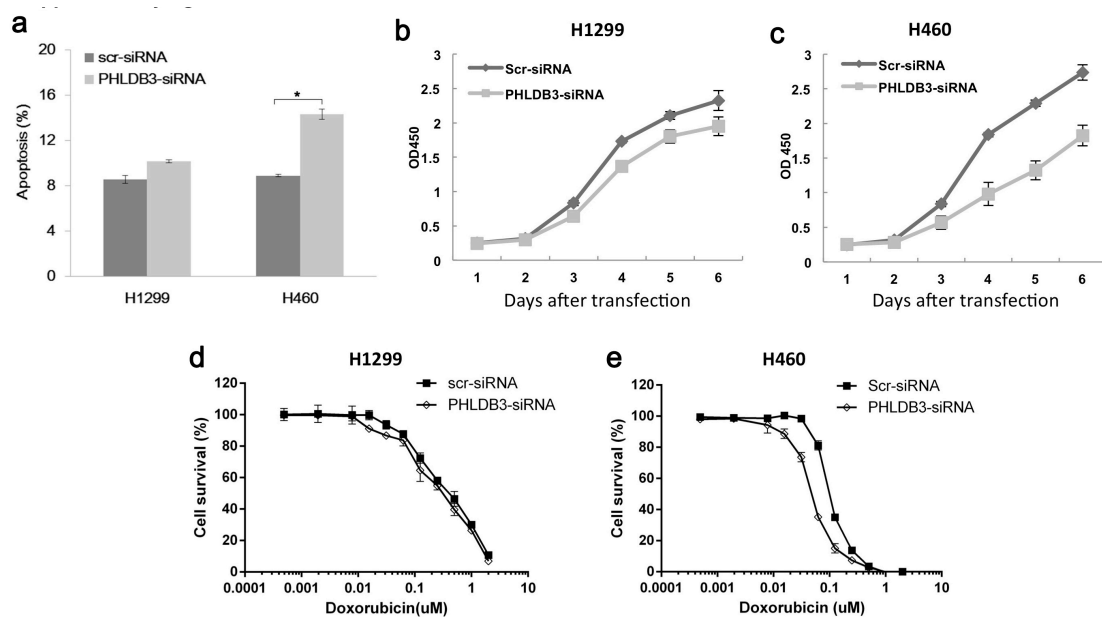

**Supplementary Figure 2. PHLDB3 knockdown induces apoptosis and inhibits cell proliferation of lung cancer cells, and sensitizes these cells to chemotherapy.**

**(a)** The effect of PHLDB3 knockdown on apoptosis of H1299 and H460 cells. H1299 and H460 cells were transfected with PHLDB3 or scramble siRNA and harvested 72h post-transfection for flow cytometry analysis. Quantification of Sub-G1 population is shown. Data represent mean  $\pm$  s.e.m. of triplicate experiments. \* $P < 0.01$  by two-tailed t-test. **(b) and (c)** The effect of PHLDB3 knockdown on cell growth. H1299 and H460 cells were transfected with PHLDB3 or scramble siRNA and cell viability was evaluated every 24 h by CCK8. **(d) and (e)** Knockdown of PHLDB3 sensitizes lung cancer cells to chemotherapy. H1299 and H460 cells were transfected with PHLDB3 or control siRNA, and seeded in 96-well plates next day. Doxorubicin was supplemented for 72h before cell viability detection by CCK-8.

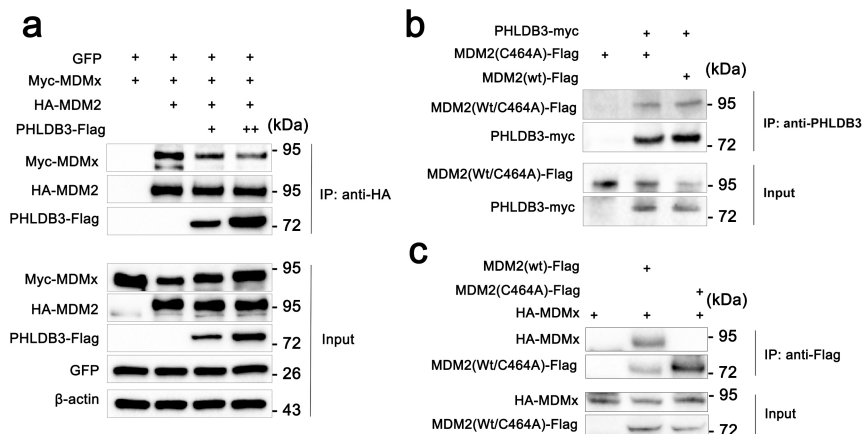

**Supplementary Figure 3. PHLDB3 competes with MDMX for binding to wild type, but not C464A mutant, MDM2.**

(a) Ectopic PHLDB3 reduces the interaction between MDM2 and MDMX in a dose dependent manner. HEK293 cells were transfected with plasmids encoding MDMX and/or MDM2 and/or different amounts of PHLDB3 plasmid as indicated followed by Co-immunoprecipitation assays using antibodies as indicated. (b) The interaction between ectopic PHLDB3 and wild type or mutant (C464A) MDM2. HEK293 cells were transfected with plasmids encoding PHLDB3 and/or wild type or C464A mutant MDM2 as indicated followed by Co-immunoprecipitation assays using antibodies as indicated. (c) MDMX interacts with wild type, but not C464A mutant, MDM2. HEK293 cells were transfected with plasmids encoding MDMX and/or MDM2 or MDM2 (C464A) as indicated followed by Co-immunoprecipitation assays using antibodies as indicated.

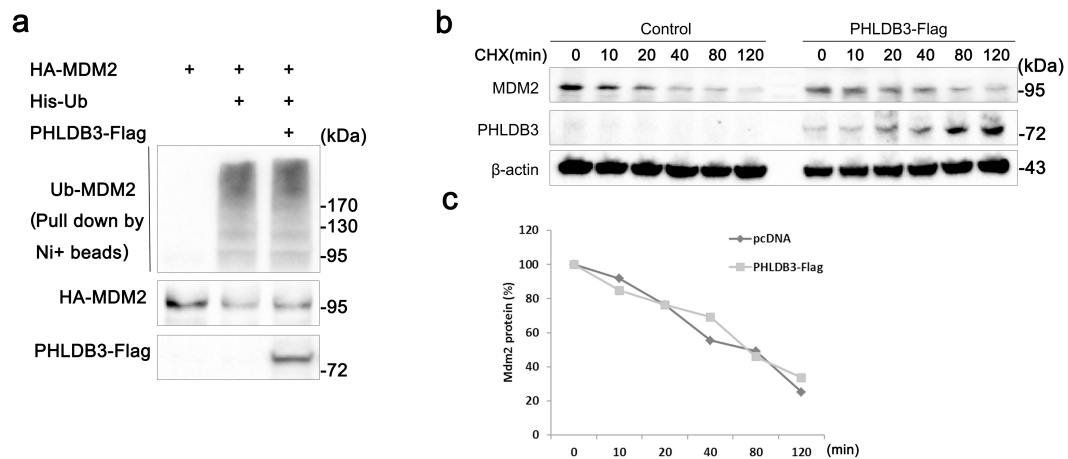

**Supplementary Figure 4. PHLDB3 does not affect MDM2 ubiquitination and stability.**

(a) Ectopic PHLDB3 does not appear to affect the ubiquitination of MDM2. HCT116<sup>p53+/+</sup> cells were transfected with combinations of plasmids encoding EGFP, HA-MDM2 or PHLDB3-Flag followed by immunoblotting using antibodies as indicated. MG132 was supplemented to the medium for 6 h. (b) and (c) PHLDB3 overexpression does not appear to affect MDM2's half-life. HCT116<sup>p53+/+</sup> cells transfected with PHLDB3 or pcDNA3 vector for 36h were treated with 100  $\mu$ g/ml of CHX and harvested at different time points as indicated. The MDM2 protein level was detected by immunoblotting (b), and quantified by densitometry and plotted against time to determine MDM2's half-lives (c).

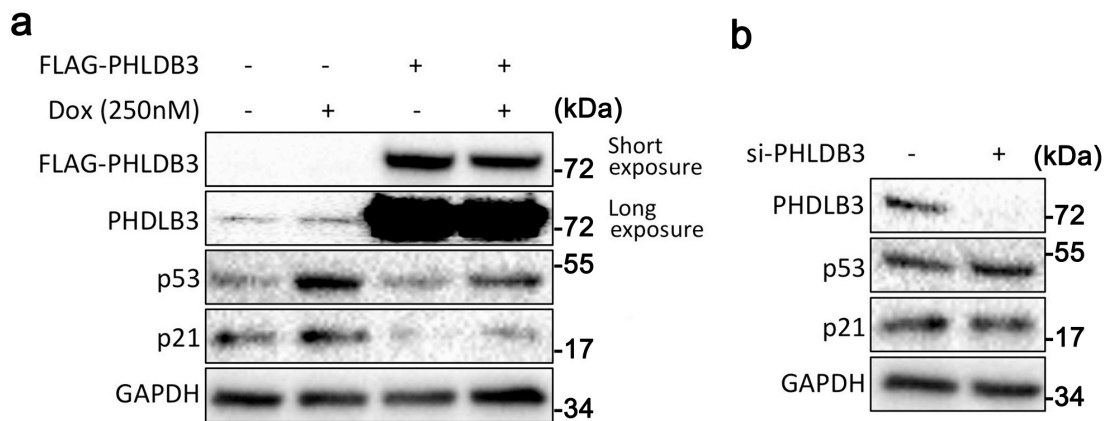

**Supplementary Figure 5. Effect of PHLDB3 on p53 pathway in WI-38 cells.**

(a) WI-38 cells were transfected with vector DNA or FLAG-PHLDB3, and 24 h after transfection the cells were treated with vehicle or 250 nM doxorubicin (Dox) for 18 h and then subjected to immunoblotting analysis. (b) WI-38 cells were transfected with scramble or PHLDB3 siRNAs and subjected to immunoblotting analysis 72 h after transfection.

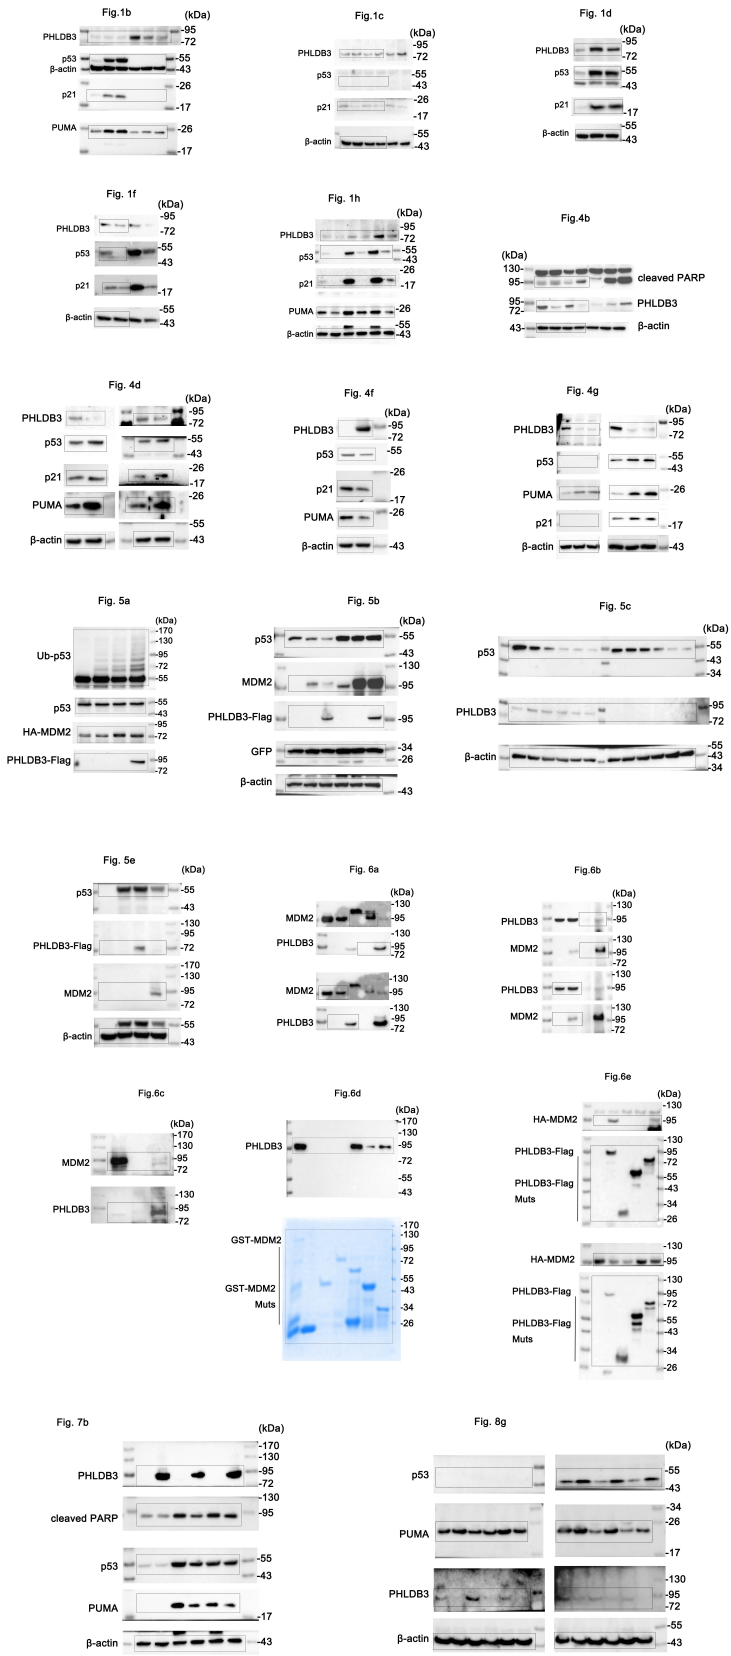

**Supplementary Figure 6. Original scans of Western blotting corresponding to the main figures.**

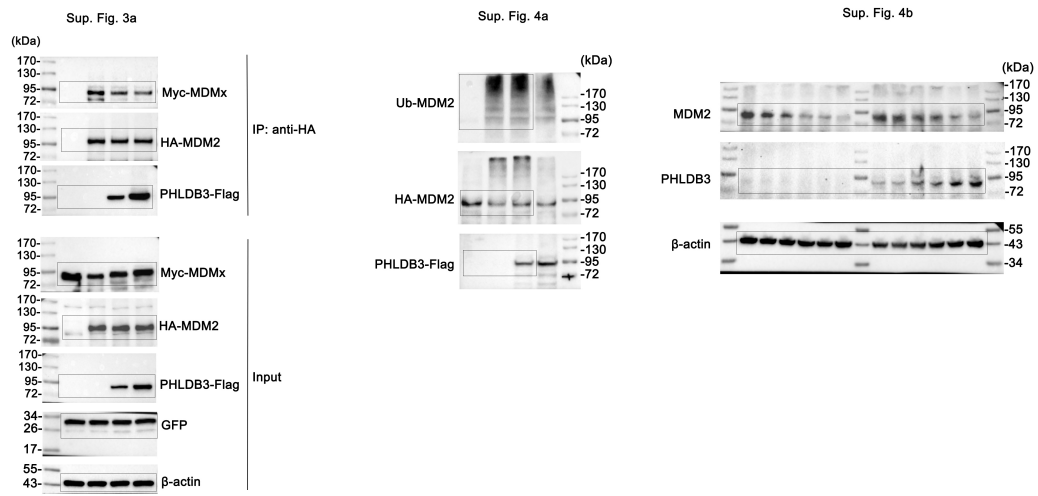

**Supplementary Figure 7. Original scans of Western blotting corresponding to supplementary figures 3 and 4.**
